# Supplementary material for: A CRISPR/Cas12a-powered gold/nickel foam surface-enhanced Raman spectroscopy biosensor for nucleic acid specific detection in foods
Source: Royal Society of Chemistry journal article supplement (doi:10.1039/d4an00778f), 2024-01-01
Supplement: d4an00778f1.pdf [file d4an00778f1.pdf]

# CRISPR/Cas12a-Powered Gold/Nickel Foam Surface-Enhanced Raman Spectroscopy Biosensor for Nucleic Acid specific Detection in foods

Yan Liu<sup>1</sup>, Shirui Gou<sup>2</sup>, Long Qiu<sup>3</sup>, Zhiwen Xu<sup>4</sup>, Haifeng Yang<sup>5</sup>, Shiping Yang<sup>6</sup> and Yu Zhao<sup>1\*</sup>

<sup>1</sup>College of Life Sciences, Shanghai Normal University, Shanghai, China

<sup>2</sup>Wuxi Tolo Biotechnology Co., Ltd, Wuxi, Jiangsu, China

<sup>3</sup>Technology Center for Animal Plant and Food Inspection and Quarantine of Shanghai Customs, Shanghai, China

\*Authors to whom correspondence should be addressed. Correspondence:  
[zhaoyu@shnu.edu.cn](mailto:zhaoyu@shnu.edu.cn).

## 1. Table S1. Sequences used in this study.

| Name               | Sequence (5'-3')                                                                                                                                                                                                                             |
|--------------------|----------------------------------------------------------------------------------------------------------------------------------------------------------------------------------------------------------------------------------------------|
| crRNA              | UAAUUUCUACUCUUGUAGA <u>UCCCUAGGCUCUGGCCGUUGC</u>                                                                                                                                                                                             |
| ssDNA-ROX reporter | / Thiol-CCCCCCCC-ROX                                                                                                                                                                                                                         |
| Reporter-FQ        | FAM-CCCCCCCC-BHQ1                                                                                                                                                                                                                            |
| RT-F               | GTCTTCTTTCTTCCAGGGCTC                                                                                                                                                                                                                        |
| RT-R               | GTGTCCCAATTTAGACTCCTAC                                                                                                                                                                                                                       |
| HAV-cDNA           | TGCTTGTAATATTAATTCCTGCAGGTTTCAGGGTTCTTAAATCTGTT<br>TCTCTATAAGAACACTCATTTTTTCACGCTTTCTGTCTTCTTTCTTCCA<br>GGGCTCTCCCCTTGCCCTAGGCTCTGGCCGTTGCGCCCGGCGGGGTC<br>AACTCCATGATTAGCATGGAGCTGTAGGAGTCTAAATTGGGGACAC<br>AGATGTTTGGAACGTCACCTTGCAGTGTTAA |

## 2. Compared the CRISPR-SERS biosensor with RT-PCR for target DNA detection.

Here, HAV-cDNA was spiked to bottle water to make different concentration samples. HAV-cDNA standard was quantified by DeNovx (DS-11 Spectrophotometer). Real-time PCR was

carried out using a SGExcel Univesal SYBR qPCR Mix (Sangon Biotech (Shanghai) Co., Ltd). The PCR system consisted of 10  $\mu$ L of mix (1 $\times$ ), 0.4  $\mu$ L of forward and reverse primers (200 nmol/L), 2  $\mu$ L of template, and 7.2  $\mu$ L of RNase-free H<sub>2</sub>O. The amplification step was performed through a fluorescent quantitative PCR detection system (Biogener Q3200, Hangzhou Biogener Technology Co., Ltd., Hangzhou, China).

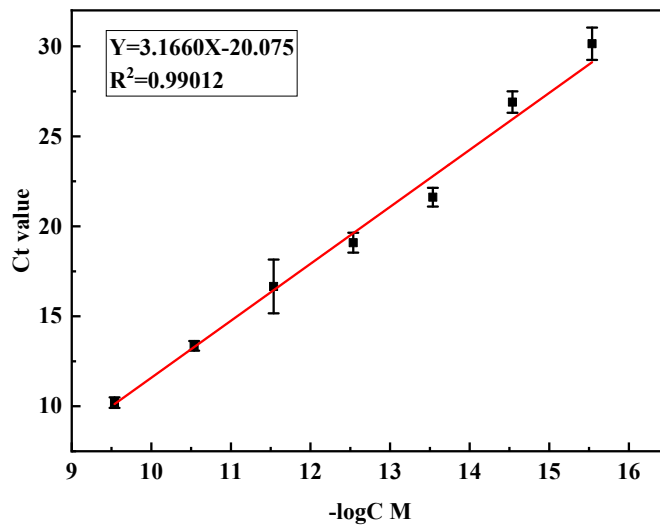

Fig. S1. The linear regression of Ct value the logarithmic concentration of HAV-cDNA.

Error bars represent standard deviation (n = 3)

**Table S2** A summary of current CRISPR/Cas12a-based SERS detection methods

| No. | SERS substrates      | Signal reporter                                                   | Time     | The test material                                           | Amplification | Sensitivity | Ref.         |
|-----|----------------------|-------------------------------------------------------------------|----------|-------------------------------------------------------------|---------------|-------------|--------------|
| 1   | AAO-AgNPs            | 6'-Carboxy-X-rhodamine(ROX)(1503cm <sup>-1</sup> )                | 2h       | Salmonella Typhimurium                                      | Free          | 110 CFU/mL  | <sup>1</sup> |
| 2   | AuNPs                | 4-ATP(1590cm <sup>-1</sup> )                                      | 59min    | Hepatitis Bvirus(HBV)                                       | Free          | pM          | <sup>2</sup> |
| 3   | SiO <sub>2</sub> @Au | 5,5'-Dithiobis-(2-nitrobenzoicacid) (DTNB)(1332cm <sup>-1</sup> ) | 1h       | HIV-1 dsDNA                                                 | Free          | fM          | <sup>3</sup> |
| 4   | AgNPs                | 4-Aminothiophenol(4-ATP) (1074cm <sup>-1</sup> )                  | 30-40min | Severe acute respiratory syndrome coronavirus2 (SARS-CoV-2) | Free          | fM          | <sup>4</sup> |
| 5   | AuNPs@Ni Foam(AuNFs) | ROX(1503cm <sup>-1</sup> )                                        | 30min    | HAV-cDNA                                                    | Free          | fM          | This work    |

**Table S3** Comparison with the SERS-based nucleic acid detection method

| No. | SERS substrates                              | The test material             | method                             | Amplification | LOD        | Ref.      |
|-----|----------------------------------------------|-------------------------------|------------------------------------|---------------|------------|-----------|
| 1   | Au NP@Si                                     | Circulating tumor DNA (ctDNA) | cycled enzymatic DNA amplification | Yes           | 7.9fM      | 5         |
| 2   | Au@4-MBA@Ag NPs                              | microRNA-21                   | LFA                                | Free          | 84fM       | 6         |
| 3   | AuNPs(DNA hyperbranched nanostructures)      | bacterial 16 S rDNA           | RCA                                | Yes           | 15fM       | 7         |
| 4   | paper-based SERS substrate composed of AgNWs | Bacterial DNA                 | PCR                                | Yes           | 3.12 pg/mL | 8         |
| 5   | AuNPs@Ni Foam(AuNFs)                         | HAV-cDNA                      | CRISPR                             | Free          | 8.23fM     | This work |

## Reference

1. F. Jia, B. Li, Y. He, Y. Shen, J. Chen, X. Li and Y. Li, *Lwt*, 2023, **189**, 115476.
2. Y. Du, S. Ji, Q. Dong, J. Wang, D. Han and Z. Gao, *Analytica Chimica Acta*, 2023, **1245**, 340864.
3. Y. Pang, Q. Li, C. Wang, S. zhen, Z. Sun and R. Xiao, *Chemical Engineering Journal*, 2022, **429**, 132109.
4. J. Liang, P. Teng, W. Xiao, G. He, Q. Song, Y. Zhang, B. Peng, G. Li, L. Hu, D. Cao and Y. Tang, *Journal of Nanobiotechnology*, 2021, **19**, 273.
5. X. Miao, Q. Fang, X. Xiao, S. Liu, R. Wu, J. Yan, B. Nie and J. Liu, *Front Mol Biosci*, 2021, **8**, 676065.
6. W. Wang, Y. Li, A. Nie, G. C. Fan and H. Han, *Analyst*, 2021, **146**, 848-854.
7. Y. Zeng, P. Qi, J. Chen, P. Wang and D. Zhang, *Sensors and Actuators B: Chemical*, 2023, **396**, 134423.
8. H. G. Lee, W. Choi, S. Y. Yang, D.-H. Kim, S.-G. Park, M.-Y. Lee and H. S. Jung, *Sensors and Actuators B: Chemical*, 2021, **326**, 128802.
